# Supplementary material for: Anhedonia and depression severity dissociated by dmPFC resting-state functional connectivity in adolescents
Source: PubMed Central journal article supplement (PMC6380625; doi:10.1177/0269881118799935), 2018-09-27
Supplement: jop-2018-3438-File002.pdf [file jop-2018-3438-File002.pdf]

## Supplementary data

### Anhedonia and depression severity dissociated by dmPFC Resting-State Functional Connectivity in Adolescents.

#### Running title:

RSFC and depression symptoms in adolescence

#### Category:

Regular research article

Ewelina Rzepa PhD, Ciara McCabe\* PhD.

School of Psychology and Clinical Language Sciences, University of Reading, UK.

\* Corresponding author:

**Dr Ciara McCabe**

Associate Professor of Neuroscience,

School of Psychology and Clinical Language Sciences,

University of Reading,

Reading RG6 6AL,

Tel: +44 118 378 5450

[c.mccabe@reading.ac.uk](mailto:c.mccabe@reading.ac.uk)

Table S1: Medication status of participants with MDD diagnosis.

| Participant ID | Medicated during study | History of medications                            |
|----------------|------------------------|---------------------------------------------------|
| 1              | Citalopram 10mg        | Sertraline                                        |
| 2              | -                      | Bupropion, Fluoxetine,<br>Sertraline, Mirtazapine |
| 3              | Fluoxetine 50mg        | -                                                 |
| 4              | Sertraline 100mg       | -                                                 |
| 5              | -                      | Fluoxetine 20-60mg,<br>Sertraline 50mg            |
| 6              | Sertraline 100mg       | Citalopram                                        |
| 7              | Sertraline             | -                                                 |
| 8              | -                      | Fluoxetine 20mg                                   |
| 9              | Citalopram 20mg        | -                                                 |
| 10             | Citalopram 40mg        | -                                                 |
| 11             | -                      | Citalopram 20mg                                   |
| 12             | Citalopram 30mg        | -                                                 |
| 13             | Fluoxetine 40mg        | -                                                 |
| 14             | Sertraline 10mg        | -                                                 |
| 15             | Fluoxetine 60mg        | -                                                 |
| 16             | -                      | Fluoxetine 20mg                                   |
| 17             | -                      | Citalopram 20mg                                   |
| 18             | Paroxetine 20mg        | -                                                 |
| 19             | -                      | Citalopram 20mg                                   |
| 20             | -                      | Fluoxetine 20mg                                   |
| 21             | Citalopram 40mg        | -                                                 |
| 22             | Sertraline 50mg        | -                                                 |

Table S2. Functional connectivity between seeds and whole brain in healthy controls.

| Brain regions             | MNI coordinates |    |     | z-score |
|---------------------------|-----------------|----|-----|---------|
|                           | X               | Y  | Z   |         |
| <b><u>Left dmPFC</u></b>  |                 |    |     |         |
| Frontal pole              | -24             | 36 | 28  | 10.6    |
| Frontal Pole              | -24             | 46 | 24  | 7.79    |
|                           | 32              | 42 | 34  | 6.28    |
| ACC/paracing              | -10             | 36 | 26  | 6.39    |
| Frontal pole              | 28              | 30 | 36  | 4.68    |
| Frontal Operculum         | -40             | 20 | 2   | 4.13    |
| Cortex/insula             |                 |    |     |         |
| <b><u>Right dmPFC</u></b> |                 |    |     |         |
| Frontal Pole              | 18              | 34 | 30  | 10.7    |
| ACC/Paracing              | 2               | 44 | 28  | 6.5     |
| Superior Frontal Gyrus    | 12              | 36 | 40  | 6.61    |
| Middle Temporal Gyrus     | 64              | 0  | -24 | 5.13    |
| Temporal Pole             | 54              | 4  | -38 | 4.26    |

|                         |     |     |     |      |
|-------------------------|-----|-----|-----|------|
| LOC                     | 8   | -58 | 8   | 4.24 |
| Cuneal cortex/Precuneus | 4   | -70 | 24  | 4.43 |
| Precuenus               | 6   | -54 | 18  | 4.03 |
| <b><u>L NAcc</u></b>    |     |     |     |      |
| NAcc                    | -8  | 10  | -6  | 13.6 |
| OFC                     | 20  | 8   | -18 | 5.58 |
| Paracingulate Gyrus     | -2  | 54  | 4   | 5.58 |
| OFC                     | -18 | 6   | -24 | 5.36 |
| Precuenus/PCC           | -4  | -52 | 10  | 4.21 |
| Precuenus/PCC           | 12  | -52 | 4   | 4.09 |
| <b><u>R NAcc</u></b>    |     |     |     |      |
| NAcc                    | 10  | 10  | -8  | 13.7 |
| Paracingulate Gyrus     | 16  | 2   | -28 | 5.04 |
| Frontal Medial cortex   | -6  | 32  | -18 | 4.76 |
| Frontal Pole            | 22  | 38  | -22 | 4.72 |
| Precuenus/PCC           | 4   | -54 | 6   | 4.03 |
| PCC                     | 8   | -46 | 4   | 3.76 |
| PCC                     | -4  | -48 | 32  | 2.85 |
| Frontal Pole            | -44 | 52  | 0   | 3.61 |
| Parahippocampal gyrus   | -28 | -38 | -4  | 2.76 |
| Hippocampus             | -22 | -32 | -10 | 2.33 |
| <b><u>pgACC</u></b>     |     |     |     |      |
| pgACC                   | 0   | 32  | 0   | 8.8  |
| ACC/Paracingulate       | -6  | 46  | 4   | 8.37 |
| Frontal Pole            | -10 | 56  | 14  | 6.79 |
| Middle Temporal Gyrus   | 64  | -4  | -16 | 6.5  |
| OFC/Insula              | 30  | 14  | -18 | 5.65 |
| LOC                     | -52 | -64 | 36  | 5.06 |
| LOC                     | 50  | -66 | 40  | 3.24 |
| Parahippocampal gyrus   | 26  | -22 | -18 | 6.13 |

OFC- orbitofrontal cortex; PCC- posterior cingulate cortex; ACC- anterior cingulate cortex; pgACC- pregenual anterior cingulate cortex, LOC-Lateral Occipital Cortex

**Table S3:** RSFC between seed regions and whole brain compared between DS and HC groups controlled for medication status and age.

| Brain Region | MNI Coordinates |   |   | z-score | Cluster size | P value |
|--------------|-----------------|---|---|---------|--------------|---------|
|              | X               | Y | Z |         |              |         |

***Increased connectivity in DS vs. HC*****R dmPFC seed**

|                   |     |    |    |      |     |       |
|-------------------|-----|----|----|------|-----|-------|
| Frontal Pole      | -32 | 32 | 12 | 4.11 | 485 | <.001 |
| ACC/Paracingulate | -8  | 25 | 22 | 3.2  | 485 | <.001 |

**L dmPFC seed**

|                   |    |     |    |     |     |       |
|-------------------|----|-----|----|-----|-----|-------|
| Postcentral gyrus | 54 | -14 | 42 | 3.9 | 297 | 0.008 |
|-------------------|----|-----|----|-----|-----|-------|

**L NAcc seed**

|           |     |     |    |      |     |       |
|-----------|-----|-----|----|------|-----|-------|
| Precuneus | -14 | -60 | 34 | 3.86 | 238 | 0.008 |
| Precuneus | 6   | -60 | 38 | 3.21 | 238 | 0.008 |

**pgACC seed**

|                  |     |     |    |      |     |       |
|------------------|-----|-----|----|------|-----|-------|
| Thalamus         | -2  | -4  | -4 | 4.27 | 655 | <.001 |
| Putamen          | -26 | 4   | 0  | 4.12 | 655 | <.001 |
| Caudate          | -10 | 8   | 16 | 3.8  | 655 | <.001 |
| NAcc             | 6   | 6   | -2 | 3.51 | 655 | <.001 |
| Planum Temporale | -60 | -38 | 14 | 4.64 | 286 | 0.008 |
| STG              | -66 | -24 | 12 | 3.92 | 286 | 0.008 |

***Decreased connectivity in DS vs. HC*****R dmPFC seed**

|               |     |     |    |      |     |       |
|---------------|-----|-----|----|------|-----|-------|
| Cuneal cortex | -2  | -82 | 26 | 4.09 | 328 | 0.002 |
| Precuneus     | -20 | -78 | 24 | 2.88 | 328 | 0.002 |
| Precuneus     | 8   | -76 | 36 | 3.1  | 282 | 0.002 |

**L dmPFC seed**

|         |    |     |     |      |     |        |
|---------|----|-----|-----|------|-----|--------|
| ITG/MTG | 58 | -22 | -26 | 4.14 | 407 | <0.001 |
| LOC     | 40 | -84 | 8   | 4.03 | 388 | 0.001  |

**pgACC seed**

|                   |     |     |    |      |     |       |
|-------------------|-----|-----|----|------|-----|-------|
| SFG/MFG           | -22 | 16  | 44 | 3.88 | 385 | 0.001 |
| Postcentral gyrus | -38 | -22 | 60 | 3.98 | 269 | 0.013 |

All  $p$ -values  $Z > 2.3$  voxel-wise thresholding and a family-wise error-corrected cluster significance threshold of  $P < 0.05$ , further Bonferroni corrected for number of ROIs gave  $P < 0.012$  (i.e.,  $P < 0.05$  (Davidson et al., 2003)). pgACC- pregenual anterior cingulate cortex, ACC-anterior cingulate cortex, dmPFC- dorsal medial prefrontal cortex, LOC- lateral Occipital Cortex, NAcc- nucleus accumbens, STG- Superior Temporal gyrus, IFG- Inferior temporal gyrus, SFG- Superior Frontal Gyrus, MFG- Medial frontal gyrus, IFG- inferior frontal gyrus, ACC- anterior cingulate cortex, dmPFC- dorsal medial prefrontal cortex, LOC- lateral Occipital Cortex, NAcc- nucleus accumbens, MFG- Medial frontal gyrus, IFG- inferior frontal gyrus.
